# Supplementary material for: Exploring Plant Functional Diversity and Ecological Dynamics in Urban Forests: Insights from Metropolitan Manila
Source: Research Square preprint supplement (doi:10.21203/rs.3.rs-6281039/v1), 2025-04-25
Supplement: Supplementary file 1 [file d8c49fb03e619eff7dd95249.docx]

**Supplementary table 1.** Plant Species Inventory of Las Piñas-Parañaque Wetland Park

This table presents an inventory of plant species recorded in the Las Piñas-Parañaque Wetland Park. The list includes scientific name and family classification.

| **Plant species inventory: Las Piñas-Parañaque Wetland Park** | |
| --- | --- |
| **Species** | **Family** |
| *Calophyllum inophyllum* | Calophyllaceae |
| *Leucaena leucocephala* | Fabaceae |
| *Vitex parviflora* | Verbenaceae |
| *Morinda citrifolia* | Rubiaceae |
| *Azadirachta indica* | Meliaceae |
| *Murraya paniculata* | Rutacaeae |
| *Rivina humilis* | Phytolaccaceae |
| *Solanum diphyllum* | Solanaceae |
| *Lagerstroemia speciosa* | Lythraceae |
| *Terminalia catappa* | Combretaceae |
| *Cocos nucifera* | Arecaceae |
| *Ficus ulmifolia* | Moraceae |
| *Thespesia populnea* | Malvaceae |
| *Averrhoa bilimbi* | Oxalidaceae |
| *Gliricidia sepium* | Fabaceae |
| *Murraya koenigii* | Rutaceae |
| *Caryota mitis* | Arecaceae |
| *Antidesma bunius* | Euphorbiaceae |
| *Pithecellobium dulce* | Fabaceae |
| *Lumnitzera racemosa* | Combretaceae |
| *Hibiscus rosa-sinensis* | Malvaceae |
| *Manilkara zapota* | Sapotaceae |

**Supplementary table 2.** Plant Species Inventory of Arroceros Forest Park.

This table presents an inventory of plant species recorded in the Arroceros Forest Park. The list includes scientific name and family classification.

| **Plant species inventory: Arroceros Forest Park** | |
| --- | --- |
| **Species** | **Family** |
| *Calophyllum inophyllum* | Calophyllaceae |
| *Leucaena leucocephala* | Fabaceae |
| *Vitex parviflora* | Verbenaceae |
| *Azadirachta indica* | Meliaceae |
| *Murraya paniculata* | Rutaceae |
| *Rivina humilis* | Phytolaccaceae |
| *Terminalia catappa* | Combretaceae |
| *Ficus ulmifolia* | Moraceae |
| *Averrhoa bilimbi* | Oxalidaceae |
| *Caryota mitis* | Arecaceae |
| *Polyalthia longifolia* | Annocaceae |
| *Cordyline fruticosa* | Asparagaceae |
| *Ficus septica* | Moraceae |
| *Chrysophyllum cainita* | Sapotaceae |
| *Pterocarpus indicus* | Fabaceae |
| *Mangifera indica* | Anacardiaceae |
| *Delonix regia* | Fabaceae |
| *Podocarpus macrophyllus* | Podocarpaceae |
| *Diospyros blancoi* | Ebenaceae |
| *Swietenia macrophylla* | Meliaceae |
| *Ptychosperma macarthurii* | Arecaceae |
| *Adonidia merrillii* | Arecaceae |
| *Rhapis excelsa* | Arecaceae |
| *Saribus rotundifolius* | Arecaceae |
| *Psidium guajava* | Myrtaceae |
| *Gmelina arborea* | Lamiaceae |

**Supplementary table 3.** Common Plant Species Found in Both Las Piñas-Parañaque Wetland Park (LPPWP) and Arroceros Forest Park (AFP)

This table presents plant species that are commonly found in both Las Piñas-Parañaque Wetland Park (LPPWP) and Arroceros Forest Park (AFP). It includes scientific names and family classifications. Identifying these shared species helps in understanding the ecological similarities and potential conservation linkages between these urban green spaces.

| **Common species (Found both in LPPWP and AFP)** | |
| --- | --- |
| *Calophyllum inophyllum* | Calophyllaceae |
| *Leucaena leucocephala* | Fabaceae |
| *Vitex parviflora* | Verbenaceae |
| *Azadirachta indica* | Meliaceae |
| *Murraya paniculata* | Rutaceae |
| *Rivina humilis* | Phytolaccaceae |
| *Terminalia catappa* | Combretaceae |
| *Ficus ulmifolia* | Moraceae |
| *Averrhoa bilimbi* | Oxalidaceae |
| *Caryota mitis* | Arecaceae |
